# Supplementary material
Source: PubMed Central journal article supplement (PMC2538939)
Supplement: 2007.149989_1.pdf [file 2007.149989_1.pdf]

## SUPPLEMENTAL DATA

### Control of local calcium release activation by DHPR calcium channel openings

Eva Poláková, Alexandra Zahradníková, jr., Jana Pavelková, Ivan Zahradník, and Alexandra Zahradníková, Institute of Molecular Physiology and Genetics, Centre of Excellence for Cardiovascular Research, Slovak Academy of Sciences, Vlárská 5, 833 34 Bratislava, Slovakia

#### Latency distribution of $Ca^{2+}$ spikes

**Derivation of the latency distribution of calcium spikes.** Distribution of single DHPR channel open times can be considered monoexponential (Rose *et al.*, 1992; Sham *et al.*, 1998) with the open time constant  $\tau_o$  (but see Josephson *et al.*, 2002). Then, according to Colquhoun & Hawkes (1995), the probability density of DHPR channel open times ( $pdf_{Open}$ ) can be described as

$$pdf_{Open}(t) = \frac{e^{-\frac{t}{\tau_o}}}{\tau_o}, \quad (\text{Eq. S1})$$

where  $t$  is time.

The time course of RyR activation by a step increase of  $Ca^{2+}$  concentration follows higher order kinetics (Zahradnikova *et al.*, 1999; Zahradnikova *et al.*, 2003; Zahradnikova *et al.*, 2007), therefore the probability of RyR activation during a step  $Ca^{2+}$  elevation can be described by the function

$$P_{Act}(t) = \left(1 - e^{-\frac{t}{\tau_{act}}}\right)^n \quad (\text{Eq. S2})$$

where  $\tau_{act}$  is the RyR activation time constant at the given  $Ca^{2+}$  concentration, and  $n$  is the exponent of RyR activation.

The probability density of RyR activation relative to the onset of a step calcium elevation is the time derivative of Eq. S2:

$$pdf_{Act}(t) = \frac{ne^{-\frac{t}{\tau_{act}}}\left(1 - e^{-\frac{t}{\tau_{act}}}\right)^{n-1}}{\tau_{act}}. \quad (\text{Eq. S3})$$

Upon stepping the voltage from a potential near the reversal potential  $V_r$  of calcium current, at which DHPRs are activated but no calcium enters the cell, to a negative potential, an inward (tail) calcium current starts to flow instantaneously through DHPRs that were open at the time of the voltage change. If the tail potential  $V_{tail}$  is sufficiently negative, the DHPR channels which once closed will not reopen again. In

other words, at very negative  $V_{tail}$ , each open DHPR channel will contribute to RyR activation by a single opening only, and for the duration of this opening. Therefore the probability density of calcium release activation in response to a DHPR opening starting at  $t = 0$ ,  $pdf_{Cpl}$ , will be proportional to both,  $pdf_{Act}(t)$  and to the integral of the probability density of open times at the interval from  $t$  to infinity:

$$pdf_{Cpl}(t) = pdf_{Act}(t) \int_t^{\infty} pdf_{Open}(t) dt = \frac{ne^{-\frac{t}{\tau_o} - \frac{t}{\tau_{act}}}\left(1 - e^{-\frac{t}{\tau_{act}}}\right)^{n-1}}{\tau_{act}} \quad (\text{Eq. S4})$$

The resulting cumulative distribution function for the probability of calcium release activation is then

$$cdf_{Cpl}(t) = \int_0^t pdf_{Cpl}(t) dt. \quad (\text{Eq. S5a})$$

Eq. S5a can be solved for any integer exponent of RyR activation,  $n$ . We have solved Eq. S5a for  $n = 1 - 4$ , 6 and 8. As shown below, the best approximation of the experimental data was obtained for  $n = 4$ , for which the solution of Eq. S5a is

$$cdf_{Cpl}(t) = 4\tau_o \left( \frac{1}{\tau_o + \tau_{act}} - \frac{3}{2\tau_o + \tau_{act}} + \frac{3}{3\tau_o + \tau_{act}} - \frac{1}{4\tau_o + \tau_{act}} \right) - 4\tau_o e^{-\frac{t(4\tau_o + \tau_{act})}{\tau_o \tau_{act}}} \left( \frac{e^{\frac{3t}{\tau_{act}}}}{\tau_o + \tau_{act}} - \frac{3e^{\frac{2t}{\tau_{act}}}}{2\tau_o + \tau_{act}} + \frac{3e^{\frac{t}{\tau_{act}}}}{3\tau_o + \tau_{act}} - \frac{1}{4\tau_o + \tau_{act}} \right) \quad (\text{Eq. S5b})$$

The probability that a single calcium channel opening will eventually activate a calcium spike, i.e., the coupling fidelity, is then

$$P_{Cpl} = \left[ cdf_{Cpl}(t) \right]_{t \rightarrow \infty}, \quad (\text{Eq. S6a})$$

which for the exponent of RyR activation  $n = 4$  gives

$$P_{Cpl} = 4\tau_o \left( \frac{1}{\tau_o + \tau_{act}} - \frac{3}{2\tau_o + \tau_{act}} + \frac{3}{3\tau_o + \tau_{act}} - \frac{1}{4\tau_o + \tau_{act}} \right). \quad (\text{Eq. S6b})$$

Because individual calcium release sites contain  $n_{DHPR}$  DHPRs, calcium spike activation is equivalent to activation of calcium release by at least one calcium channel opening, and in analogy to the formula given by Inoue and Bridge (2005), the cumulative distribution of the probability of calcium spike activation will be

$$cdf_{Spike}(t) = 1 - (1 - P_O cdf_{Cpl}(t))^{n_{DHPR}}, \quad (\text{Eq. S7})$$

where  $P_O$  is the open probability of calcium channel at  $t = 0$ , and  $cdf_{Cpl}(t)$  follows Eq. S5. The probability density of calcium spike activation is then

$$pdf_{Spike}(t) = \frac{d}{dt} cdf_{Spike}(t) = \frac{d}{dt} (1 - (1 - P_O cdf_{Cpl}(t))^{n_{DHPR}}), \quad (\text{Eq. S8a})$$

which for the exponent of RyR activation  $n = 4$  gives Eq. S8b, shown in Box 1. The probability of spike activation during an interval centred at  $t$  with duration  $\Delta t$  is

$$P_{Spike}(t, \Delta t) = \int_{t - \frac{\Delta t}{2}}^{t + \frac{\Delta t}{2}} pdf_{Spike}(t) dt = cdf_{Spike}\left(t + \frac{\Delta t}{2}\right) - cdf_{Spike}\left(t - \frac{\Delta t}{2}\right)$$

(Eq. S9a)

and for the exponent of RyR activation  $n = 4$  we obtain Eq. S9b, shown in Box 1. This equation was used for fitting the experimentally obtained distributions of calcium spike latencies.

### Fitting of the latency distribution of calcium spikes.

Distribution of calcium spike latencies (Figure 3 of the main text) was fitted with Eq. S9a solved for the exponents of RyR activation fixed to  $n = 1, 2, 3, 4, 6$

and 8. Separate fitting sessions were performed for different fixed values of the open probability  $P_O$  from the interval 0.025 – 0.6. Four data sets, i.e., latencies of calcium spikes at the tail potential of -120 mV in response to 1.5-ms and 5-ms prepulses in control as well as in the presence of BayK 8644 were simultaneously approximated by the appropriate model. The optimal values of

- $n_{DHPR}$  (equal for all four data sets),
- $\tau_{act}$  (separate values for data in control and in the presence of BayK 8644), and
- $\tau_O$  (only for the data in control, since the value of  $\tau_O$  in the presence of BayK 8644 was fixed to the time constant of tail calcium current at the tail potential of -120 mV)

were determined for each combination  $P_O$  and  $n$ . It was found that for any exponent  $n$ , the quality of fit did not depend on  $P_O$ . The use of the exponent  $n = 1$  and 2 provided unacceptable results (not shown). For  $n = 1$  the theoretical latency probability density has a maximum at  $t = 0$ , while the experimentally observed maximum was at  $t > 0$ . For  $n = 2$  clusters of >1000 DHPRs were required to obtain a satisfactory fit. The results for  $n = 1$  and 2 were therefore not analyzed further.

For  $n \geq 3$ , the values of  $\tau_O$  and  $\tau_{act}$  did not significantly depend on  $P_O$  (not shown). The value of  $\tau_O$  did not depend on the exponent of RyR activation, while  $nP_O$  and  $\tau_{act}$  decreased with  $n$  almost in parallel, and increasing the exponent of activation increased the estimated value of coupling fidelity only within a certain range, as illustrated in Figure S1A - C, respectively, for  $P_O = 0.2$ . The quality of fit was not significantly different for  $n = 3$  and  $n = 4$ , while it was

$$pdf_{Spike}(t) = \frac{d}{dt} cdf_{Spike}(t) = \frac{4n_{DHPR} P_O \tau_O}{\tau_{act}} e^{-t \left( \frac{1}{\tau_O} + \frac{4}{\tau_{act}} \right)} \left( e^{\frac{t}{\tau_{act}}} - 1 \right)^3$$

$$\left( 1 - 4P_O \tau_O \left( \frac{6\tau_O^3}{(\tau_O + \tau_{act})(2\tau_O + \tau_{act})(3\tau_O + \tau_{act})(4\tau_O + \tau_{act})} - e^{-\frac{t(4\tau_O + \tau_{act})}{\tau_O \tau_{act}}} \left( \frac{e^{\frac{3t}{\tau_{act}}}}{\tau_O + \tau_{act}} - \frac{3e^{\frac{2t}{\tau_{act}}}}{2\tau_O + \tau_{act}} + \frac{3e^{\frac{t}{\tau_{act}}}}{3\tau_O + \tau_{act}} - \frac{1}{4\tau_O + \tau_{act}} \right) \right) \right)^{n_{DHPR} - 1} \quad (\text{Eq. S8b})$$

$$P_{Spike}(t, \Delta t) =$$

$$\left( 1 - 4P_O \tau_O \left( \frac{6\tau_O^3}{(\tau_O + \tau_{act})(2\tau_O + \tau_{act})(3\tau_O + \tau_{act})(4\tau_O + \tau_{act})} - e^{-\frac{(2t - \Delta t)(4\tau_O + \tau_{act})}{2\tau_O \tau_{act}}} \left( \frac{e^{\frac{3(2t - \Delta t)}{2\tau_{act}}}}{\tau_O + \tau_{act}} - \frac{3e^{\frac{2(2t - \Delta t)}{2\tau_{act}}}}{2\tau_O + \tau_{act}} + \frac{3e^{\frac{2t - \Delta t}{2\tau_{act}}}}{3\tau_O + \tau_{act}} - \frac{1}{4\tau_O + \tau_{act}} \right) \right) \right)^{n_{DHPR}} -$$

$$\left( 1 - 4P_O \tau_O \left( \frac{6\tau_O^3}{(\tau_O + \tau_{act})(2\tau_O + \tau_{act})(3\tau_O + \tau_{act})(4\tau_O + \tau_{act})} - e^{-\frac{(2t + \Delta t)(4\tau_O + \tau_{act})}{2\tau_O \tau_{act}}} \left( \frac{e^{\frac{3(2t + \Delta t)}{2\tau_{act}}}}{\tau_O + \tau_{act}} - \frac{3e^{\frac{2(2t + \Delta t)}{2\tau_{act}}}}{2\tau_O + \tau_{act}} + \frac{3e^{\frac{2t + \Delta t}{2\tau_{act}}}}{3\tau_O + \tau_{act}} - \frac{1}{4\tau_O + \tau_{act}} \right) \right) \right)^{n_{DHPR}} \quad (\text{Eq. S9b})$$

Box 1. Probability distributions of calcium spike latencies for DHPR activation exponent  $n = 4$ .

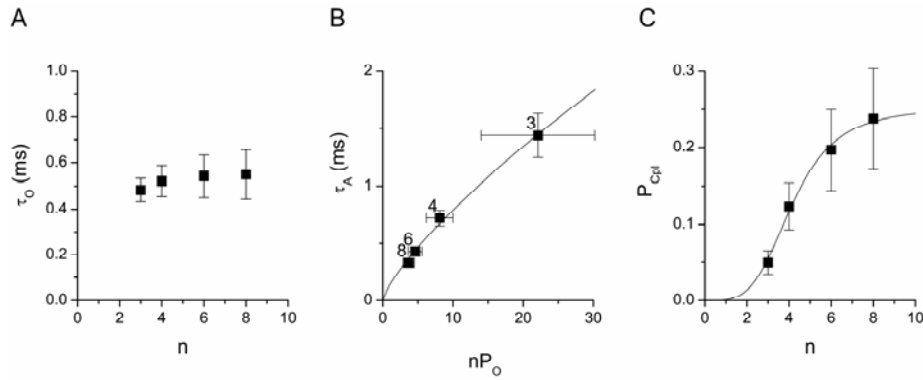

**Figure S1.** The dependence of kinetic parameters related to calcium release activation on the exponent of RyR activation. **A** – Open time of DHPR channels in the absence of Bay K 8644. **B** – The relationship between the RyR activation time constant ( $\tau_{act}$ ) and  $nP_O$  of the DHPR calcium channel cluster. Labels denote the exponent of activation  $n$ . The line shows the allometric relationship  $\tau_{act} = (0.14 \pm 0.02) nP_O^{0.76 \pm 0.04}$ . **C** – Coupling fidelity in the absence of BayK 8644. The line denotes the relationship  $P_{Cpl} = P_{max} \frac{K^{n_H}}{K^{n_H} + n^{n_H}}$  with  $K = 4.15$ ,  $n_H = 4$ ,  $P_{max} = 0.25$ .

significantly worse for  $n > 4$  ( $p < 0.05$ ) and unacceptable for  $n = 1$  and  $2$  ( $p < 0.001$ ). The exponent  $n = 3$  provided large errors of estimates with a large fitted value of  $nP_O$  (Figure S1 B). This value of  $nP_O$  was considered unacceptable, because it would require over 100 DHPRs per release site. Therefore only the model with  $n = 4$  was considered further. It should be mentioned that the expression for  $cdf_{Spike}$  in Eq. S9a provides analytical functions suitable for fitting only for integer values of  $n$ .

The estimated values of the parameters  $\tau_O$  and  $\tau_{act}$  did not depend on the value of DHPR open probability  $P_O$ . As shown in Figure S2 A, B, there was no significant difference between the values of any of these parameters in the  $P_O$  range of 0.025 – 0.6. The estimated value of  $n_{DHPR}$  was inversely proportional to  $P_O$  (Figure S2 C), so that the estimated value of  $nP_O$  (Figure S2 D) was independent of  $P_O$ . As a result, the values of  $P_{Cpl}$  and  $P_{Spike}$  (Eq. S6B and Eq. 4 of the main text) were independent of  $P_O$  as well (Figure S2 E, F).

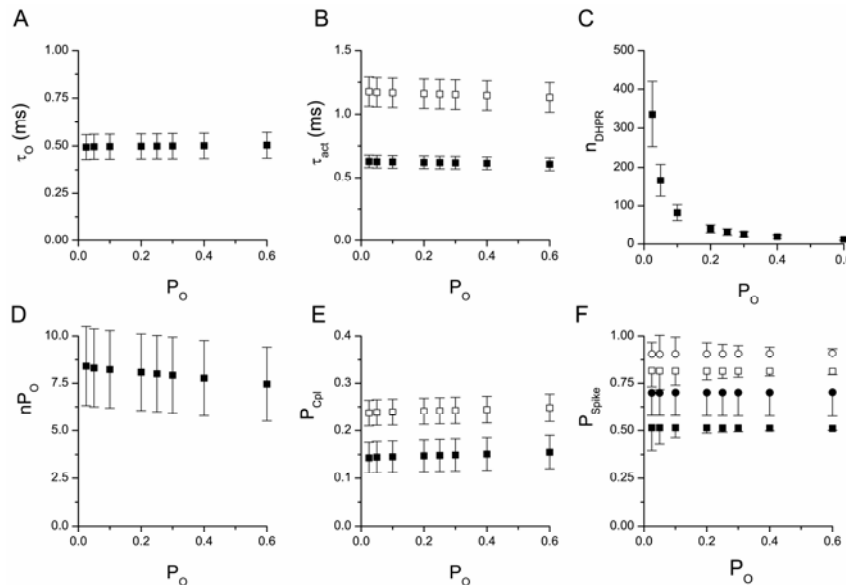

**Figure S2.** Fitting results at different preset values of DHPR open probability. **A** – DHPR open time in the absence of BayK 8644. **B** – RyR activation time constant under different experimental conditions. **C** - The dependence of  $n_{DHPR}$  on the value of preset DHPR open probability. **D** -  $nP_O$  of fully activated DHPRs in the absence of BayK 8644. **E** – Coupling fidelity at -120 mV tail potential under different experimental conditions. **F** – Spike probability at -120 mV tail potential under different experimental conditions. In panels B, E and F, filled and open symbols stand for the absence and presence of BayK 8644; in panel F, squares and circles denote 1.5- and 5-ms prepulses, respectively.

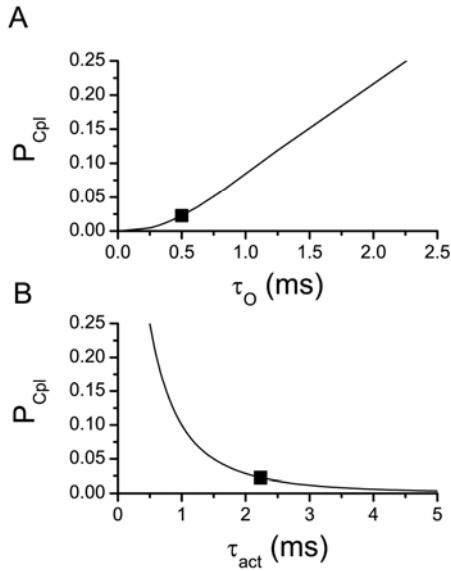

**Figure S3.** Coupling fidelity at +10 mV as a function of  $\tau_O$  (A) and  $\tau_{act}$  (B). Solid symbols stay for the respective values derived for control conditions from Table 1 and Eq. 6 of the main text.

### Sensitivity of coupling fidelity to changes in coupling parameters

Sensitivity of coupling fidelity to coupling parameters was assessed using Eq. S6B that was solved for various  $\tau_O$  and  $\tau_{act}$ . The value of coupling fidelity at a membrane potential of +10 mV, at which the whole-cell calcium current is maximal and which is close to the action potential plateau, was used as the reference. The value of  $\tau_{act}$  at +10 mV was calculated using Eq. 6 from the value of  $\tau_{act}$  at -120 mV (Table 1 of the main text), assuming  $V_r = +60$  mV, and is plotted as full symbol in Figure S3B. Then coupling fidelity was calculated with  $\tau_{act}$  kept constant and  $\tau_O$  varied (Figure S3A), or with  $\tau_O$  kept constant and  $\tau_{act}$  varied (Figure S3B). It can be seen that coupling fidelity is approximately proportional to  $\tau_O$ , while it is inversely proportional to  $\tau_{act}$ . Thus, coupling fidelity is sensitive to the expected physiological and pathophysiological variations of DHPR open time and RyR activation time constant.

### Simulations of calcium release gain

The experiments of Altamirano and Bers (2007) were simulated by calculating the spike probability using Eq. 4 of the main text, assuming that at  $V_m = 0$  mV, each DHPR channel displays a constant number of openings ( $n_O$ ) before it inactivates. The value of  $P_{Cpl}$  was calculated from Eq. S6b. We chose  $n_O = 20$ , so that for  $P_O = 0.2$  and  $\tau_O = 0.5$  ms, the duration of calcium currents was  $\sim 50$  ms. (Qualitatively similar

results were obtained for  $n_O = 10$ ). For standard conditions (holding potential  $V_h = -60$  mV, test potential  $V_p = 0$  mV,  $[Ca]_o = 1$  mM) we set  $\tau_O = 0.5$  ms,  $\tau_{act} = 1$  ms,  $P_O = 0.2$ ,  $n_{DHPR} = 40$ . The extent of steady-state inactivation at different holding potentials was determined from the Boltzmann equation with midpoint of -40 mV and slope parameter of 5 mV and used to calculate the average number of active DHPR channels per release site. The dependence of  $i_{Ca}$  on the external calcium concentration was calculated from the hyperbolic binding curve, assuming  $EC_{50} = 0.5$  mM. The dependence of  $i_{Ca}$  on membrane potential was assumed to be exponential ( $A e^{-kV}$ ) with  $k = 0.04$  mV $^{-1}$ , as was assumed by Altamirano & Bers (2007). The value of  $\tau_O$  was kept constant throughout the simulation. The relation between  $\tau_{act}$  and  $i_{Ca}$  was defined by Eq. 6 from the main text.

Normalized  $I_{Ca}$  was calculated from the formula

$$I_{Ca}(V_p, V_h, [Ca]_o) = \frac{i_{Ca}(V_p, [Ca]_o) n_{DHPR}(V_h)}{i_{Ca}(0, 1) n_{DHPR}(-60)}, \quad (\text{Eq. S10})$$

derived using the relationship  $I_{Ca} = n_{DHPR} P_O i_{Ca}$ , since  $P_O$  of active channels was independent of the conditions of the simulation. Normalized gain was calculated as

$$\left( \frac{P_{spike}}{I_{Ca}} \right)_{rel}(V_p, V_h, [Ca]_o) = \frac{P_{spike}(V_p, V_h, [Ca]_o) I_{Ca}(0, -60, 1)}{I_{Ca}(V_p, V_h, [Ca]_o) P_{spike}(0, -60, 1)} \quad (\text{Eq. S11}).$$

## REFERENCES

- Altamirano J & Bers DM. (2007). Voltage dependence of cardiac excitation-contraction coupling: unitary  $Ca^{2+}$  current amplitude and open channel probability. *Circ Res* **101**, 590-597.
- Colquhoun D & Hawkes AG. (1995). The principles of the stochastic interpretation of ion-channel mechanisms. In *Single-channel recording, 2nd edition*, ed. Sakmann B & Neher E, pp. 397-482. Plenum, New York.
- Inoue M & Bridge JH. (2005). Variability in couplon size in rabbit ventricular myocytes. *Biophys J* **89**, 3102-3110.
- Josephson IR, Guia A, Lakatta EG & Stern MD. (2002). Modulation of the gating of unitary cardiac L-type  $Ca^{2+}$  channels by conditioning voltage and divalent ions. *Biophys J* **83**, 2575-2586.
- Rose WC, Balke CW, Wier WG & Marban E. (1992). Macroscopic and unitary properties of physiological ion flux through L-type  $Ca^{2+}$  channels in guinea-pig heart cells. *J Physiol (London)* **456**, 267-284.
- Sham JS, Song LS, Chen Y, Deng LH, Stern MD, Lakatta EG & Cheng H. (1998). Termination of  $Ca^{2+}$

release by a local inactivation of ryanodine receptors in cardiac myocytes. *Proc Natl Acad Sci U S A* **95**, 15096-15101.

Zahradnikova A, Dura M, Gyorke I, Escobar AL, Zahradnik I & Gyorke S. (2003). Regulation of dynamic behavior of cardiac ryanodine receptor by  $Mg^{2+}$  under simulated physiological conditions. *Am J Physiol* **285**, C1059-C1070.

Zahradnikova A, Jr., Polakova E, Zahradnik I & Zahradnikova A. (2007). Kinetics of calcium spikes in rat cardiac myocytes. *J Physiol (London)* **578**, 677-691.

Zahradnikova A, Maco P, Menhart P & Zahradnik I. (1999). A novel dynamic algorithm for stochastic simulation of a group of coupled ionic channels. *Biophys J* **76**, A460-A460.
